1 Activation of 2,4-diaminoquinazoline in *Mycobacterium tuberculosis* by Rv3161c, a  
2 putative dioxygenase

3

4

5 Eduard Melief, Shilah A. Bonnett, Edison S. Zuniga, Tanya Parish\*

6

7 TB Discovery Research, Infectious Disease Research Institute, Seattle, WA, 98102

8 USA

9

10 Running Title: Activation of diaminoquinazolines by Rv3161c

11

12 \*Address correspondence to Tanya Parish

13 Tel: +1 206 858 6075

14 [tanya.parish@idri.org](mailto:tanya.parish@idri.org)

15

16 **Abstract**

17 The diaminoquinazoline series has good potency against *Mycobacterium tuberculosis*.  
18 Resistant isolates have mutations in Rv3161c, a putative dioxygenase. We carried out  
19 metabolite analysis on wild-type and an Rv3161c mutant strain after exposure to a  
20 diaminoquinazoline. The parental compound was found in intracellular extracts from the  
21 mutant, but not the wild-type. A metabolite consistent with a mono-hydroxylated form  
22 was identified in the wild-type. These data support the hypothesis that Rv3161c  
23 metabolizes diaminoquinazolines in *M. tuberculosis*.

24

25

26 **Keywords**

27 Diaminoquinazoline, *Mycobacterium tuberculosis*, anti-tubercular, prodrug, activation,  
28 monooxygenases, dioxygenases

29

30 The diaminoquinazoline scaffold has been utilized in the generation of various tool and  
31 lead like compounds for anticancer and antimalarial drug discovery programs (1, 2). A  
32 high throughput screening campaign led to the discovery of a series of  
33 diaminoquinazoline (DAQ) compounds that was active against *Mycobacterium*  
34 *tuberculosis* with minimum inhibitory concentrations (MIC) in the sub-micromolar range  
35 (3). We carried out a structure activity relationship analysis to evaluate the potential of  
36 the DAQ series and identified a number of analogs with improved anti-tubercular activity  
37 and good exposure in rat pharmacokinetic studies (4). DAQ compounds had  
38 bactericidal activity against replicating and non-replicating bacteria (4). The target for  
39 the DAQ series is not known, but DAQ-resistant isolates have mutations in Rv3161c, a  
40 putative dioxygenase (4). Since Rv3161c is not essential, and we predict that the  
41 mutation would lead to reduced or lower activity, it is unlikely that this is the intracellular  
42 target of the series.

43  
44 Rv3161c is highly induced in *M. tuberculosis* treated with benzene-containing  
45 compounds such as thioridazine, SRI#967, SRI#9190 and triclosan (5-7). However,  
46 triclosan was equally active against wild-type and Rv3161c deletion strains of *M.*  
47 *tuberculosis*. In addition, strains which over-expressed Rv3161c did not demonstrate  
48 triclosan resistance, suggesting it is not involved in mediating resistance (5).

49  
50 We hypothesize that DAQ compounds are prodrugs activated by Rv3161c. In order to  
51 assess this hypothesis we wanted to determine if DAQ molecules were transformed  
52 after uptake by *M. tuberculosis*. In our previous work, we had only determined the MIC

53 on solid medium using the serial proportion method (8). For compound IDR-0010006,  
54 the MIC<sub>99</sub> for wild-type was 6.25 μM, but for the resistant mutants was 25 μM (a 4-fold  
55 shift) (4). In order to run metabolite identification studies, we determined the MICs for  
56 the wild-type and resistant strains in Middlebrook 7H9 liquid medium supplemented with  
57 10% v/v OADC (oleic acid, albumin, dextrose, catalase) and 0.05% w/v Tween 80.  
58 Compounds were tested as a 10-point, 2-fold serial dilution in 96-well plates as  
59 described (9)(8). Growth was measured after 5 days at 37°C and the % growth  
60 calculated with respect to controls. Curves were fitted using the Levenberg-Marquardt  
61 algorithm and IC<sub>90</sub> calculated as the concentration of compound required to inhibit  
62 growth by 90%. We determined IC<sub>90</sub>s for IDR-0010006 and IDR-0258237 against wild-  
63 type and the mutants strain containing the all Rv3161<sub>C<sub>115</sub>W</sub> allele (Table 1). Both  
64 compounds were 2.5-fold less active against the mutant strain as compared to wild-  
65 type, which is comparable to the shift seen on solid medium.

66  
67 Once we had established liquid IC<sub>90</sub>, we carried out metabolite analysis using  
68 compound IDR-0258237. We first established the settings required to detect the parent  
69 compound. LC-MS was carried out on using an Agilent 1100 HPLC and G1956B  
70 LC/MSD SL mass spectrometer set in positive mode with simultaneous UV-vis detection  
71 at 214 and 254 nm. Buffer A was 0.05% formic acid in water and Buffer B was 0.05%  
72 formic acid in acetonitrile. The following solvent gradient was used (time, % Buffer B): 0  
73 min, 10%; 30 min, 6.3 min, 95%; 8.1 min, 95%; 8.4 min, 10%; and 10.5 min, 10%.  
74 Under these conditions, compound IDR-0258237 eluted at ~4.5 min with a m/z value of

75 336, which is consistent with the calculated exact mass ( $[M+H]^+$ ) of the parent  
76 compound (Fig 1A).

77  
78 Next, we treated wild-type and mutant strains with compound IDR-0258237. *M.*  
79 *tuberculosis* cultures were grown in 100 mL of 7H9-Tw-OADC in 450 cm<sup>2</sup> roller bottles  
80 at 100 rpm for 5 days at 37°C. Compound IDR-0258237 was added at 20 μM for 24 h or  
81 48h; DMSO was used as a negative control. Cells were harvested by centrifugation,  
82 extracted with an equal volume of 1:1 chloroform-methanol and incubated at 55°C for  
83 30 min. Samples were re-extracted with 1:1 chloroform-methanol and the two extracts  
84 pooled. The volume was adjusted to 5 mL with 1:1 chloroform-methanol and refluxed for  
85 16-24 hr. Pellets were extracted with chloroform, dried, resuspended in 1:1  
86 acetonitrile:water and subjected to LC-MS analysis (Fig 1 and Fig 2).

87  
88 In the wild-type strain, we did not see a peak corresponding to IDR-0258237 in the total  
89 ion chromatogram (TIC) (Fig 1B). In contrast, a peak consistent with IDR-0258237 was  
90 observed in extracts from the mutant strain (Fig 1B). Similar results were observed after  
91 48 h of incubation (Fig 1D and 1E).

92  
93 Rv3161c is a putative dioxygenase, which could catalyze the incorporation of two  
94 oxygen atoms into the substrate. Alternatively, it could function as a monooxygenase  
95 and catalyze the introduction of a single oxygen atom. We extracted the ion masses of  
96 all potential mono-hydroxylated and di-hydroxylated products from the TIC from all  
97 samples (Fig 2). An ion (**1**) with a retention time of ~4.1 min and m/z of 354, was

98 observed in the wild-type extracts, but not in any of the controls or in the Rv3161c  
99 mutant extracts (Fig. 2). The MS properties of this ion are consistent with the addition of  
100 one water molecule across the heteroaromatic ring system resulting in the mono-  
101 hydroxylation of N1 (mono-hydroxylated DAQ) (Fig. 3). Alternatively, an epoxidation will  
102 also give the observed ion with an exact mass of 354. We did not detect any other  
103 mono-hydroxylated, di-hydroxylated or cleaved aromatic ring derivatives. LC/MS-MS  
104 experiments would be needed for metabolite ID and confirmation. These results are  
105 consistent with Rv3161c catalyzing the modification of DAQ compounds into a  
106 metabolite that is active against *M. tuberculosis*.

107

108 Mutation of Rv3161c only led to low level resistance, although the mutant strain did not  
109 appear to metabolize the DAQ compound to any detectable extent. This suggests that  
110 both the parent molecule and the metabolite are active, but that the metabolite has  
111 greater activity against the unknown target. We attempted to synthesize analogs  
112 incorporating the predicted hydroxylation, but we were not successful. Therefore, a full  
113 characterization of the metabolite(s) and its activity would require a large scale  
114 purification directly from *M. tuberculosis*.

115

116 In conclusion, we have determined that a member of the DAQ series is metabolized by  
117 wild-type *M. tuberculosis*, but not by a strain containing a mutation in Rv3161c. These  
118 data support our hypothesis that the DAQ compounds are biotransformed to more  
119 active compounds within the bacterial cell.

120

121 **Funding**

122 This work was funded in part by Eli Lilly and Company in support of the mission of the  
123 Lilly TB Drug Discovery Initiative and by NIAID of the National Institutes of Health under  
124 award number R01AI099188.

## 125 References

- 126 1. Ommeh S, Nduati E, Mberu E, Kokwaro G, Marsh K, Rosowsky A, Nzila A. 2004.  
127 In vitro activities of 2,4-diaminoquinazoline and 2,4-diaminopteridine derivatives against  
128 *Plasmodium falciparum*. Antimicrobial Agents and Chemotherapy 48:3711-3714.
- 129 2. Hao C, Huang W, Li X, Guo J, Chen M, Yan Z, Wang K, Jiang X, Song S, Wang  
130 J, Zhao D, Li F, Cheng M. 2017. Development of 2, 4-diaminoquinazoline derivatives as  
131 potent PAK4 inhibitors by the core refinement strategy. European Journal of Medicinal  
132 Chemistry 131:1-13.
- 133 3. Ananthan S, Faaleolea ER, Goldman RC, Hobrath JV, Kwong CD, Laughon BE,  
134 Maddry JA, Mehta A, Rasmussen L, Reynolds RC, Secrist JA, 3rd, Shindo N, Showe  
135 DN, Sosa MI, Suling WJ, White EL. 2009. High-throughput screening for inhibitors of  
136 *Mycobacterium tuberculosis* H37Rv. Tuberculosis (Edinb) 89:334-53.
- 137 4. Odingo J, O'Malley T, Kesicki EA, Alling T, Bailey MA, Early J, Ollinger J, Dalai  
138 S, Kumar N, Singh RV, Hipskind PA, Cramer JW, Ioerger T, Sacchettini J, Vickers R,  
139 Parish T. 2014. Synthesis and evaluation of the 2,4-diaminoquinazoline series as anti-  
140 tubercular agents. Bioorganic & Medicinal Chemistry 22:6965-6979.
- 141 5. Gomez A, Andreu N, Ferrer-Navarro M, Yero D, Gibert I. 2016. Triclosan-induced  
142 genes Rv1686c-Rv1687c and Rv3161c are not involved in triclosan resistance in  
143 *Mycobacterium tuberculosis*. Scientific Reports 6:26221.
- 144 6. Dutta NK, Mehra S, Kaushal D. 2010. A *Mycobacterium tuberculosis* sigma factor  
145 network responds to cell-envelope damage by the promising anti-mycobacterial  
146 thioridazine. PLoS One 5:e10069.



- 147 7. Waddell SJ, Stabler RA, Laing K, Kremer L, Reynolds RC, Besra GS. 2004. The  
148 use of microarray analysis to determine the gene expression profiles of *Mycobacterium*  
149 *tuberculosis* in response to anti-bacterial compounds. *Tuberculosis* 84:263-274.
- 150 8. Sirgel FA, Wiid IJ, van Helden PD. 2009. Measuring minimum inhibitory  
151 concentrations in mycobacteria. *Methods in molecular biology* (Clifton, NJ) 465:173-86.
- 152 9. Ollinger J, Bailey MA, Moraski GC, Casey A, Florio S, Alling T, Miller MJ, Parish  
153 T. 2013. A dual read-out assay to evaluate the potency of compounds active against  
154 *Mycobacterium tuberculosis*. *PLoS One* 8:e60531.
- 155
- 156

157 **Figure Legends**

158 **Fig. 1. Metabolite analysis.** (A) Total Ion Chromatogram for IDR-0258237. *M.*  
159 *tuberculosis* was treated with 20  $\mu$ M of IDR-0258237 for 24 h (B) and (C) or for 48 h (D)  
160 and (E). Extracts were subjected to LC-MS. (B) and (D) wild-type strain. (C) and (E)  
161 Rv3161c mutant strain. The inset shows the m/z peaks associated with the parent ion.

162

163 **Fig. 2. Extracted-Ion Chromatogram for m/z 354.** (A) IDR-0258237-treated wild-type  
164 strain (B) IDR-0258237-treated Rv3161c mutant strain. (C) DMSO-treated wild-type  
165 strain. (E) DMSO-treated Rv3161c mutant strain. (E) Compound only.

166

167 **Fig. 3. Identification of metabolites.** (A) All possible metabolites. (B) MS spectra of  
168 the peak 1 detected in the extracted ion chromatogram. (C) Proposed structure of the  
169 active metabolite (m/z 354.2).

**Table 1.** Activity of DAQ compounds

| <b>H37Rv Strain</b> | <b>IDR-0010006</b>                      | <b>IDR-0258237</b> |
|---------------------|-----------------------------------------|--------------------|
|                     | <b>IC<sub>90</sub> (μM)<sup>a</sup></b> |                    |
| Wild-type           | 15 ± 2                                  | 22 ± 3             |
| Rv3161c (C115W)     | 38 ± 6                                  | 59 ± 8             |

<sup>a</sup>IC<sub>90</sub> was determined in liquid medium and is defined as the concentration required to inhibit growth by 90%. The results are the average ± standard deviation from a minimum of 2 experiments.

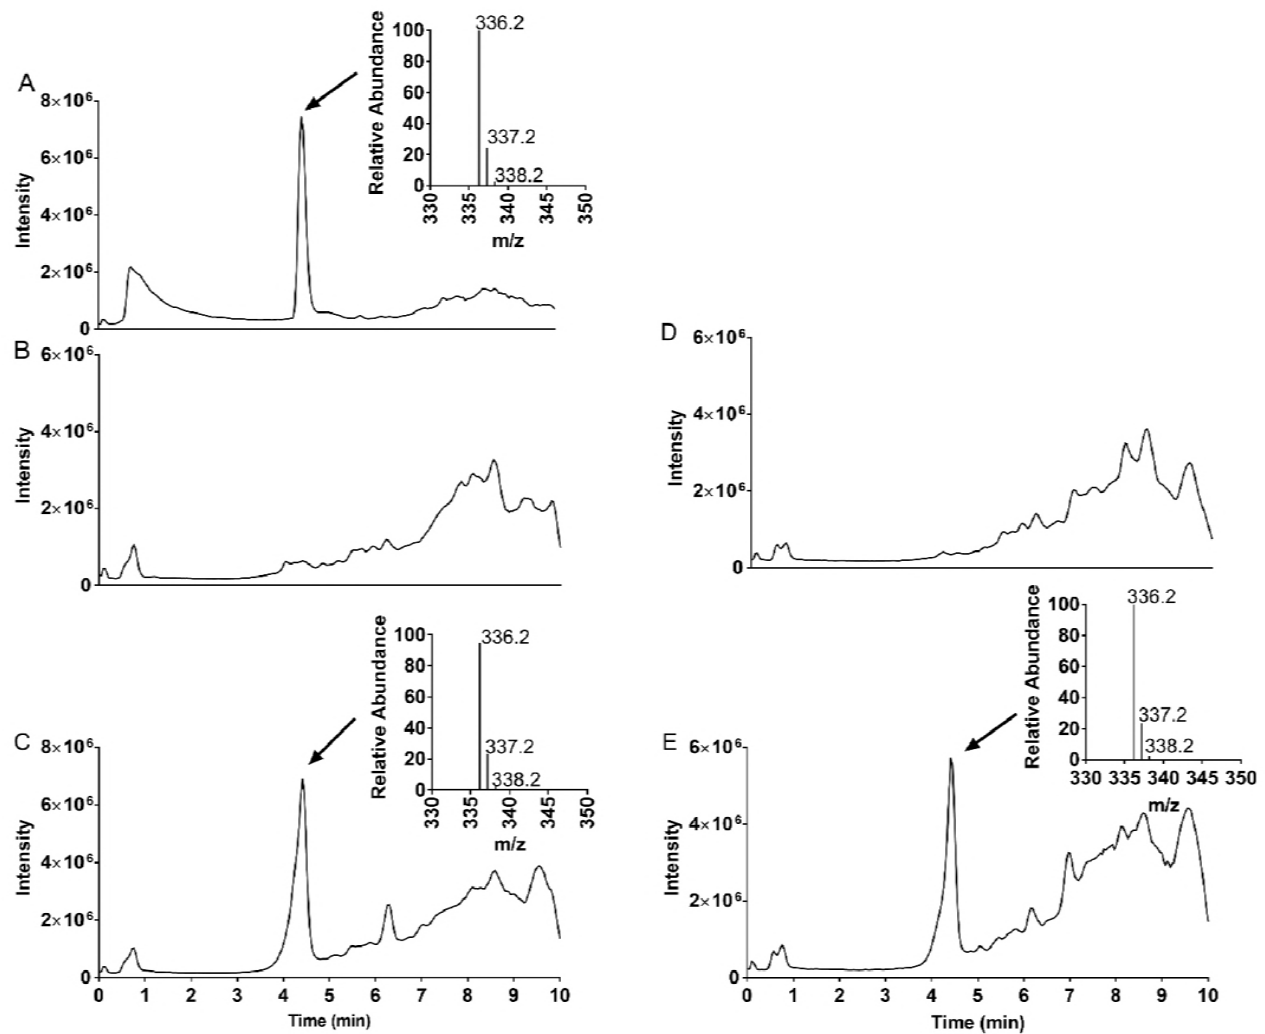

**Fig. 1. Metabolite analysis.** (A) Total Ion Chromatogram for IDR-0258237. *M. tuberculosis* was treated with 20  $\mu$ M of IDR-0258237 for 24 h (B) and (C) or for 48 h (D) and (E). Extracts were subjected to LC-MS. (B) and (D) wild-type strain. (C) and (E) Rv3161c mutant strain. The inset shows the m/z peaks associated with the parent ion.

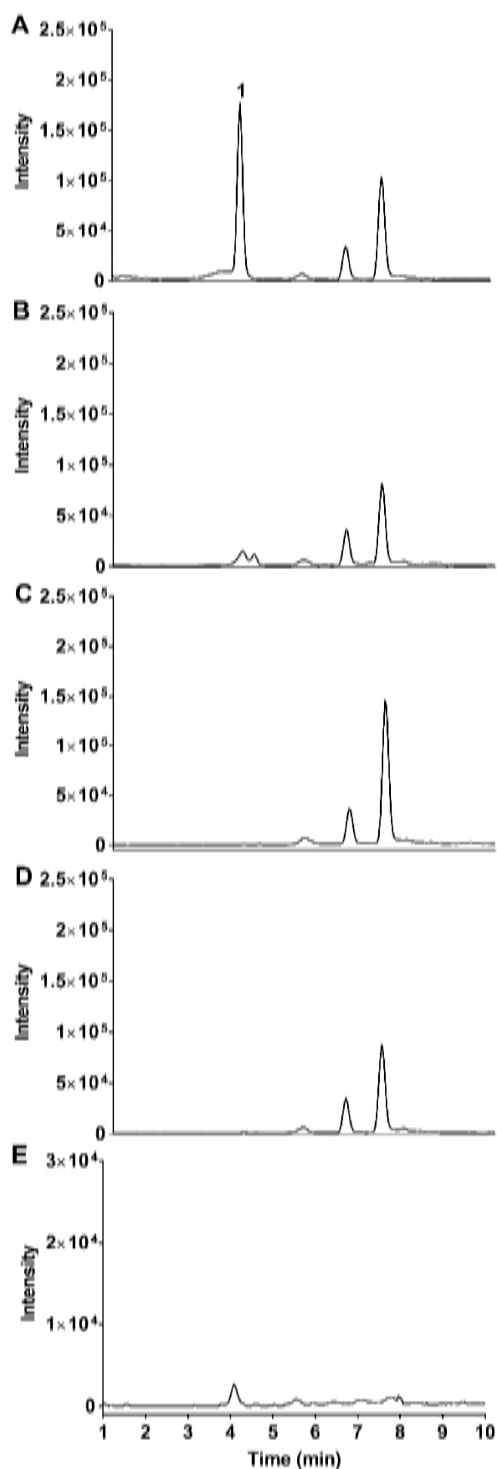

**Fig. 2. Extracted-Ion Chromatogram for m/z 354.** (A) IDR-0258237 treated wild-type strain (B) IDR-0258237 treated Rv3161c mutant strain. (C) DMSO-treated wild-type strain. (E) DMSO-treated Rv3161c mutant strain. (E) Compound only.

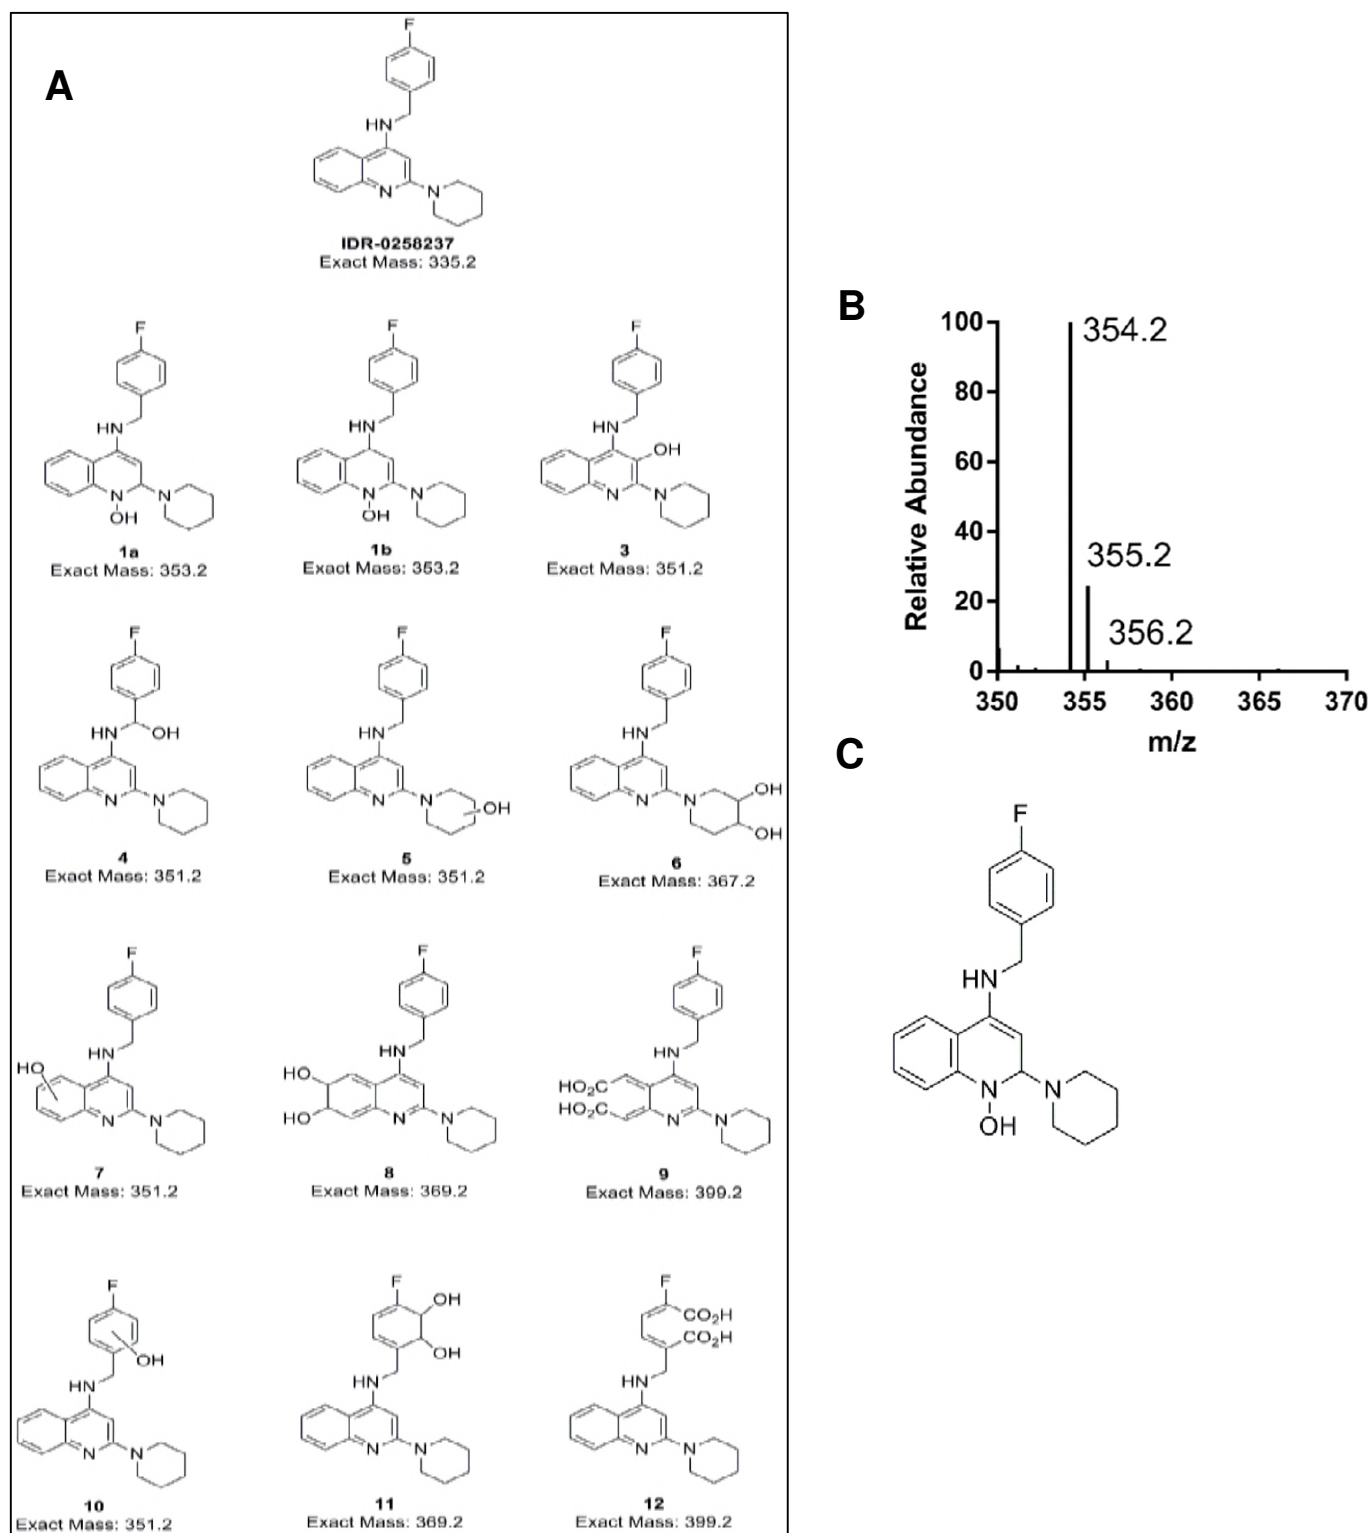

**Fig. 3. Identification of metabolites.** (A) All possible metabolites. (B) MS spectra of the peak 1 detected in the extracted ion chromatogram. (C) Proposed structure of the active metabolite (m/z 354.2).
